# Supplementary material for: Asymmetric microfiber actuators with reciprocal deformation
Source: Royal Society of Chemistry journal article supplement (doi:10.1039/d4im00017j), 2024-01-01
Supplement: d4im00017j1.pdf [file d4im00017j1.pdf]

## Description of Additional Supplementary Files

**File name:** Supplementary Movie 1

**Description: Microfiber fabrication.** This video shows the shape changes of internal oil droplets shortly after the aqueous alginate-diatomite jet has just encountered the  $\text{CaCl}_2$  solution by asymmetric shear forces on both sides of the droplet. The external flow rate is  $1 \text{ mL h}^{-1}$  and the internal flow rate is  $0.2 \text{ mL h}^{-1}$ .

**File name:** Supplementary Movie 2

**Description: Reciprocal deformation during hydration.** This video shows the reciprocal deformation when a dehydrated microfiber was put in distilled water. The curvature radius of this microfiber decreased first and then increased over time.

**File name:** Supplementary Movie 3

**Description: Reciprocal deformation during dehydration.** This video shows the reciprocal deformation when a hydrated microfiber was put on a heating plate under the temperature of  $50 \text{ }^\circ\text{C}$ . The curvature radius of this microfiber increased first and then decreased over time.

**File name:** Supplementary Movie 4

**Description: Transportation of an oil droplet.** This video demonstrates the application of a microfiber actuator to deliver an oil droplet onto a glass substrate and then spontaneously disengage from the substrate by harnessing reciprocal deformation.

**File name:** Supplementary Movie 5

**Description: Transportation of a glass ball.** This video demonstrates the application of a microfiber actuator to transport a solid cargo to the destination with spontaneous disengagement by harnessing reciprocal deformation.
