# Supplementary material for: Asymmetric microfiber actuators with reciprocal deformation
Source: Royal Society of Chemistry journal article supplement (doi:10.1039/d4im00017j), 2024-01-01
Supplement: d4im00017j7.pdf [file d4im00017j7.pdf]

Supplementary Information for  
**Asymmetric microfiber actuators with reciprocal deformation**

Yuhang Lu,<sup>†a</sup> Shiyu Wang<sup>†a</sup> and Pingan Zhu<sup>\*ab</sup>

<sup>a</sup> *Department of Mechanical Engineering, City University of Hong Kong, Hong Kong, China.*

<sup>b</sup> *Shenzhen Research Institute, City University of Hong Kong, Shenzhen, China.*

<sup>†</sup> These two authors contributed equally to this work.

\*Corresponding author. Email: pingazhu@cityu.edu.hk

**Table S1.** Comparisons of various microactuators.

| <b>Energy source</b> | <b>Type</b>                                             | <b>Advantages</b>                                                                                            | <b>Disadvantages</b>                                                                                                            |
|----------------------|---------------------------------------------------------|--------------------------------------------------------------------------------------------------------------|---------------------------------------------------------------------------------------------------------------------------------|
| Hygroscopic          | Asymmetric microfiber actuators (this work)             | Low-cost, easy-to-obtain, and biocompatible materials;<br>Mass production;<br>Reciprocal deformation.        | Relatively slow response and low actuation force;<br>Limited reliability.                                                       |
| Optical              | Microribbons <sup>1</sup>                               | Continuous twisting.                                                                                         | Requiring continuous driving of the optical source.                                                                             |
|                      | Resonant-opto-thermomechanical oscillator <sup>2</sup>  | Driven by low optical power                                                                                  | Requiring continuous driving of the optical source;<br>Displacement not large enough.                                           |
|                      | Structural color actuators <sup>3</sup>                 | Reversible asymmetric shape deformations combined with structural color changes.                             | Requiring continuous driving of the optical source;<br>Decrease or elimination of deformation with increasing temperature.      |
| Electrical           | Multiresponsive microactuator <sup>4</sup>              | Directional locomotion;<br>Maintaining functionality after heavy impact;<br>Excellent movement adaptability. | Requiring continuous driving of the optical/electrical source;<br>Motion speed strongly correlated with laser frequency.        |
|                      | Electric stimulus-responsive microactuator <sup>5</sup> | A simple structural design for achieving a large vibration amplitude on a millimetre scale.                  | Requiring plasmonic thermal energy generated by electrical stimulation;<br>Motion discontinues after a single stimulus trigger. |
|                      | Bending actuator                                        | Easy fabrication;                                                                                            | Requiring continuous                                                                                                            |

|          |                                                                                            |                                                                                 |                                                                                                                                               |
|----------|--------------------------------------------------------------------------------------------|---------------------------------------------------------------------------------|-----------------------------------------------------------------------------------------------------------------------------------------------|
|          | based on aligned carbon nanotube/polymer composites <sup>6</sup>                           | Low voltage; Controllable motion.                                               | driving of the voltage; Only one deformation direction.                                                                                       |
| Magnetic | Soft $\mu$ bots based on Pickering emulsions stabilized by magnetic particles <sup>7</sup> | Higher traction compared to rigid counterparts; Translation on curved surfaces. | Requiring continuous driving of the magnetic source; Lower translation speed compared to rigid $\mu$ bots; Requiring metal-free environments. |
|          | Sequence-encoded colloidal origami microbot <sup>8</sup>                                   | Directional motion, steering, and maneuvering.                                  | Requiring external magnetic fields; Necessity of changing sequences to alter functionality.                                                   |
|          | Polymer nanocomposite microactuators <sup>9</sup>                                          | Performance independent of environment; Efficient cumulative release of drugs.  | Requiring metal-free environments; Requiring a pulsatile release profile of the magnetic field.                                               |
| Acoustic | Acoustically controlled helical microrobot <sup>10</sup>                                   | Switchable directionality by simply tuning the acoustic frequency.              | Performance easy to be affected; Low propulsion efficiency.                                                                                   |
| Chemical | Chemically powered microactuator <sup>11</sup>                                             | Autonomous Energy source.                                                       | Requiring the calculation of the energy carried.                                                                                              |

---

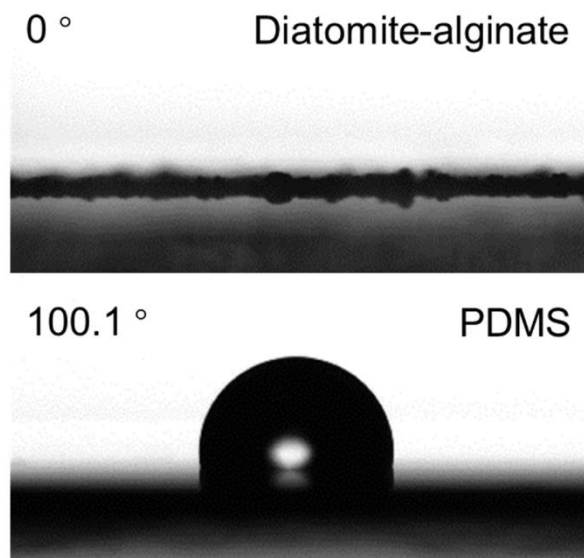

**Fig. S1** Surface wettability of diatomite-alginate (superhydrophilic with a contact angle of 0°) and PDMS (hydrophobic with a contact angle of 100.1°).

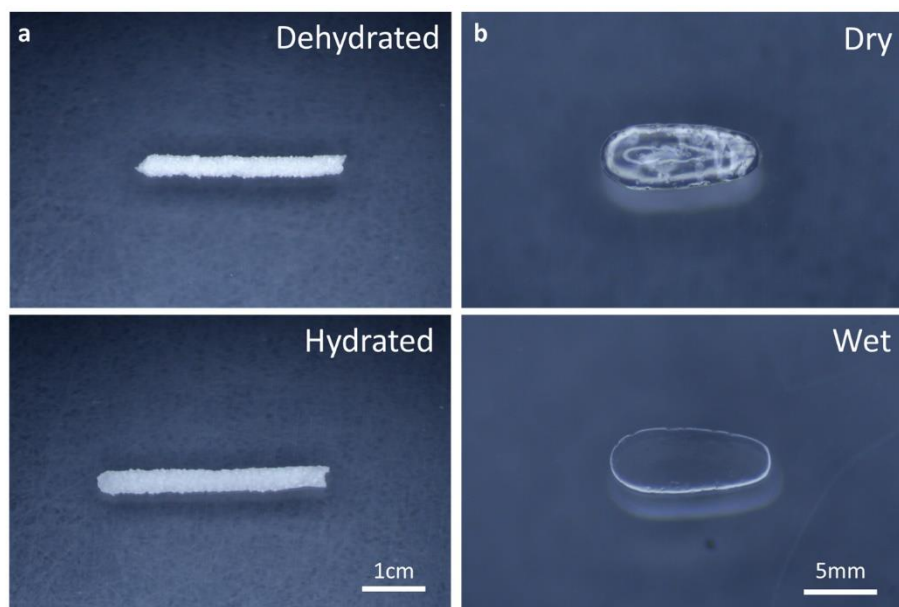

**Fig. S2** Responses of (a) alginate-diatomite and (b) PDMS to humidity changes. Alginate-diatomite exhibits changes in volume in response to humidity variations, whereas PDMS does not.

## Supplementary References

1. Y. Zhang, Y. Gong, B. Li, R.-M. Ma, Y. Che and J. Zhao, Light-driven continuous twist movements of microribbons, *Small*, 2019, **15**, 1804102.
2. S. Pevec and D. Donlagic, Resonant-opto-thermomechanical oscillator (ROTMO): A low-power, large displacement, high-frequency optically driven microactuator, *Small*, 2022, **18**, 2107552.
3. A. Belmonte, Y. Y. Ussembayev, T. Bus, I. Nys, K. Neyts and A. P. H. J. Schenning, Structural color actuators: Dual light and temperature responsive micrometer-sized structural color actuators, *Small*, 2020, **16**, 2070005
4. X. Hui, J. Luo, R. Wang and H. Sun, Multiresponsive microactuator for ultrafast submillimeter robots, *ACS Nano*, 2023, **17**, 6589-6600.
5. R. Yun, J. Che, Z. Liu, X. Yan and M. Qi, A novel electric stimulus-responsive micro-actuator for powerful biomimetic motions, *Nanoscale*, 2023, **15**, 12933-12943.
6. L. Chen, C. Liu, K. Liu, C. Meng, C. Hu, J. Wang and S. Fan, High-performance, low-voltage, and easy-operable bending actuator based on aligned carbon nanotube/polymer composites, *ACS Nano*, 2011, **5**, 1588-1593.
7. Y. Gao, B. Sprinkle, E. Springer, D. W. M. Marr and N. Wu, Rolling of soft microbots with tunable traction, *Sci. Adv.*, 2023, **9**, eadg0919.
8. K. Han, C. W. Shields, N. M. Diwakar, B. Bharti, G. P. López and O. D. Velev, Sequence-encoded colloidal origami and microbot assemblies from patchy magnetic cubes, *Sci. Adv.*, 2017, **3**, e1701108.
9. S. M. Mirvakili, Q. P. Ngo and R. Langer, Polymer nanocomposite microactuators for on-demand chemical release via high-frequency magnetic field excitation, *Nano Lett.*, 2020, **20**, 4816-4822.

10. Y. Deng, A. Paskert, Z. Zhang, R. Wittkowski and D. Ahmed, An acoustically controlled helical microrobot, *Sci. Adv.*, 2023, **9**, eadh5260.
11. R. L. Truby, Chemically fueling new microrobot abilities, *Science*, 2023, **381**, 1152-1153.
